# Supplementary material for: Nursing home staff’s perspective on end-of-life care of German nursing home residents: a cross-sectional survey
Source: Springer Nature journal article supplement (doi:10.1186/s12904-019-0512-8), 2020-01-03
Supplement: MOESM1 [file 23188826]

# Einschätzung zur medizinischen Versorgung von Pflegeheimbewohnern

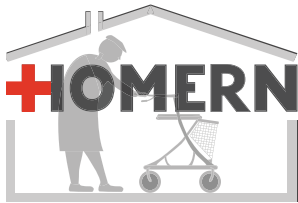

Bei Rückfragen wenden Sie sich bitte an:

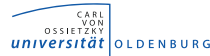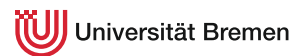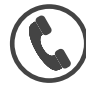

Alexander Fassmer | Carl von Ossietzky Universität Oldenburg, Department für Versorgungsforschung, Ammerländer Heerstr. 114 - 118, 26129 Oldenburg  
Telefonnr.: 0441 798-2766 | E-Mail: HOMERN@uni-oldenburg.de

**Im folgenden Fragebogen geht es um die Beurteilung der medizinischen Versorgung von Bewohnern aus Sicht der Pflegeheime. Der hier verwendete Begriff „Krankenhaustransport“ umfasst sowohl stationäre Aufenthalte als auch ambulante Notaufnahmebesuche.**

\*Zu Gunsten der besseren Lesbarkeit wird im Fragebogen ausschließlich die männliche Form verwendet (z.B. Heimbewohner, Hausärzte). Frauen sind dabei selbstverständlich in gleicher Weise angesprochen.

## Ärztliche Versorgung in Pflegeheimen

1 a) Stimmen Sie der Aussage zu, dass die Versorgung von Heimbewohnern vom Hausarzt koordiniert werden sollte?

nein  ja

b) Sollte die Behandlung von Heimbewohnern durch andere Fachärzte in der Regel nur nach Überweisung durch Hausärzte erfolgen?

nein  ja

2 Wie schätzen Sie den Versorgungsbedarf durch folgende Arztgruppen ein?

|                        | sehr gering<br>0         | 1                        | 2                        | 3                        | sehr hoch<br>4           |
|------------------------|--------------------------|--------------------------|--------------------------|--------------------------|--------------------------|
| Augenärzte             | <input type="checkbox"/> | <input type="checkbox"/> | <input type="checkbox"/> | <input type="checkbox"/> | <input type="checkbox"/> |
| Chirurgen/ Orthopäden  | <input type="checkbox"/> | <input type="checkbox"/> | <input type="checkbox"/> | <input type="checkbox"/> | <input type="checkbox"/> |
| Dermatologen           | <input type="checkbox"/> | <input type="checkbox"/> | <input type="checkbox"/> | <input type="checkbox"/> | <input type="checkbox"/> |
| Gynäkologen            | <input type="checkbox"/> | <input type="checkbox"/> | <input type="checkbox"/> | <input type="checkbox"/> | <input type="checkbox"/> |
| Hals-Nasen-Ohrenärzte  | <input type="checkbox"/> | <input type="checkbox"/> | <input type="checkbox"/> | <input type="checkbox"/> | <input type="checkbox"/> |
| Psychiater/ Neurologen | <input type="checkbox"/> | <input type="checkbox"/> | <input type="checkbox"/> | <input type="checkbox"/> | <input type="checkbox"/> |
| Urologen               | <input type="checkbox"/> | <input type="checkbox"/> | <input type="checkbox"/> | <input type="checkbox"/> | <input type="checkbox"/> |
| Zahnärzte              | <input type="checkbox"/> | <input type="checkbox"/> | <input type="checkbox"/> | <input type="checkbox"/> | <input type="checkbox"/> |

3 Inwieweit stimmen Sie den folgenden Aussagen zu?

|                                                                                                                                                   | gar nicht<br>0           | 1                        | 2                        | 3                        | voll<br>4                |
|---------------------------------------------------------------------------------------------------------------------------------------------------|--------------------------|--------------------------|--------------------------|--------------------------|--------------------------|
| Hausärzte sollten häufiger Besuche in Pflegeheimen durchführen                                                                                    | <input type="checkbox"/> | <input type="checkbox"/> | <input type="checkbox"/> | <input type="checkbox"/> | <input type="checkbox"/> |
| Die Versorgung aller Bewohner eines Heimes nur durch eine Praxis führt (im Vergleich zu mehreren Praxen) zu einer höheren Qualität der Versorgung | <input type="checkbox"/> | <input type="checkbox"/> | <input type="checkbox"/> | <input type="checkbox"/> | <input type="checkbox"/> |
| Speziell qualifizierte Medizinische Fachangestellte (MFA), die regelmäßig Heimbewohner besuchen, sind eine wichtige Unterstützung                 | <input type="checkbox"/> | <input type="checkbox"/> | <input type="checkbox"/> | <input type="checkbox"/> | <input type="checkbox"/> |
| Bei der Versorgung von Heimbewohnern ist der Kassenärztliche Bereitschaftsdienst eine wichtige Unterstützung                                      | <input type="checkbox"/> | <input type="checkbox"/> | <input type="checkbox"/> | <input type="checkbox"/> | <input type="checkbox"/> |
| Für die medizinische Versorgung in Heimen können telemedizinische Konsile hilfreich sein                                                          | <input type="checkbox"/> | <input type="checkbox"/> | <input type="checkbox"/> | <input type="checkbox"/> | <input type="checkbox"/> |

**4 Wie schätzen Sie den Versorgungsbedarf durch folgende andere Berufsgruppen ein?**

|                         | sehr gering<br>0         | 1                        | 2                        | 3                        | sehr hoch<br>4           |
|-------------------------|--------------------------|--------------------------|--------------------------|--------------------------|--------------------------|
| Physiotherapeuten.....  | <input type="checkbox"/> | <input type="checkbox"/> | <input type="checkbox"/> | <input type="checkbox"/> | <input type="checkbox"/> |
| Logopäden.....          | <input type="checkbox"/> | <input type="checkbox"/> | <input type="checkbox"/> | <input type="checkbox"/> | <input type="checkbox"/> |
| Augenoptiker.....       | <input type="checkbox"/> | <input type="checkbox"/> | <input type="checkbox"/> | <input type="checkbox"/> | <input type="checkbox"/> |
| Hörgeräteakustiker..... | <input type="checkbox"/> | <input type="checkbox"/> | <input type="checkbox"/> | <input type="checkbox"/> | <input type="checkbox"/> |
| Ernährungsberater.....  | <input type="checkbox"/> | <input type="checkbox"/> | <input type="checkbox"/> | <input type="checkbox"/> | <input type="checkbox"/> |
| Sozialarbeiter.....     | <input type="checkbox"/> | <input type="checkbox"/> | <input type="checkbox"/> | <input type="checkbox"/> | <input type="checkbox"/> |

**Versorgung im Krankenhaus und der Notaufnahme**

**5 Inwieweit stimmen Sie den folgenden Aussagen zu?**

|                                                                                                                                                         | gar nicht<br>0           | 1                        | 2                        | 3                        | voll<br>4                |
|---------------------------------------------------------------------------------------------------------------------------------------------------------|--------------------------|--------------------------|--------------------------|--------------------------|--------------------------|
| Von stationären Krankenhausaufenthalten profitieren Heimbewohner oftmals nicht.....                                                                     | <input type="checkbox"/> | <input type="checkbox"/> | <input type="checkbox"/> | <input type="checkbox"/> | <input type="checkbox"/> |
| Bei Heimbewohnern mit fortgeschrittener Demenz sollte die Indikation für einen Krankenhaustransport im Allgemeinen zurückhaltender gestellt werden..... | <input type="checkbox"/> | <input type="checkbox"/> | <input type="checkbox"/> | <input type="checkbox"/> | <input type="checkbox"/> |
| Bei Stürzen von Heimbewohnern gibt es oft keine Alternative zu einem Transport ins Krankenhaus.....                                                     | <input type="checkbox"/> | <input type="checkbox"/> | <input type="checkbox"/> | <input type="checkbox"/> | <input type="checkbox"/> |
| Pflegekräfte rufen zu häufig den Rettungsdienst ohne vorherige ärztliche Rücksprache.....                                                               | <input type="checkbox"/> | <input type="checkbox"/> | <input type="checkbox"/> | <input type="checkbox"/> | <input type="checkbox"/> |

**6 Insgesamt betrachtet, welchen Anteil stationärer Krankenhausaufenthalte und ambulanter Notaufnahmebesuche von Heimbewohnern schätzen Sie als nicht erforderlich ein?**

.....% der Krankenhausaufenthalte                      .....% der Notaufnahmebesuche

**7 Welche Bedeutung haben aus Ihrer Sicht die folgenden Maßnahmen, um Krankenhaustransporte von Heimbewohnern zu reduzieren?**

|                                                                               | keine<br>0               | 1                        | 2                        | 3                        | große<br>4               |
|-------------------------------------------------------------------------------|--------------------------|--------------------------|--------------------------|--------------------------|--------------------------|
| bessere Kommunikation zwischen Pflegekräften.....                             | <input type="checkbox"/> | <input type="checkbox"/> | <input type="checkbox"/> | <input type="checkbox"/> | <input type="checkbox"/> |
| bessere Kommunikation zwischen Pflegekräften und Hausarzt.....                | <input type="checkbox"/> | <input type="checkbox"/> | <input type="checkbox"/> | <input type="checkbox"/> | <input type="checkbox"/> |
| bessere Versorgung/ Erreichbarkeit durch Hausarzt.....                        | <input type="checkbox"/> | <input type="checkbox"/> | <input type="checkbox"/> | <input type="checkbox"/> | <input type="checkbox"/> |
| bessere Versorgung/ Erreichbarkeit durch Facharzt.....                        | <input type="checkbox"/> | <input type="checkbox"/> | <input type="checkbox"/> | <input type="checkbox"/> | <input type="checkbox"/> |
| bessere Ausstattung des Heims (z.B. Katheter, Schnelltests, Medikamente)..... | <input type="checkbox"/> | <input type="checkbox"/> | <input type="checkbox"/> | <input type="checkbox"/> | <input type="checkbox"/> |
| bessere Personalausstattung der Heime.....                                    | <input type="checkbox"/> | <input type="checkbox"/> | <input type="checkbox"/> | <input type="checkbox"/> | <input type="checkbox"/> |
| Qualifizierungsmaßnahmen für das Pflegepersonal.....                          | <input type="checkbox"/> | <input type="checkbox"/> | <input type="checkbox"/> | <input type="checkbox"/> | <input type="checkbox"/> |
| aussagekräftige Patientenverfügung.....                                       | <input type="checkbox"/> | <input type="checkbox"/> | <input type="checkbox"/> | <input type="checkbox"/> | <input type="checkbox"/> |
| Sonstiges:.....                                                               | <input type="checkbox"/> | <input type="checkbox"/> | <input type="checkbox"/> | <input type="checkbox"/> | <input type="checkbox"/> |

## Versorgung am Lebensende

8 Bitte schätzen Sie die Situation in Deutschland ein:

a) Wie hoch ist der Anteil an Heimbewohnern mit einer Patientenverfügung?

.....%

b) Wie häufig sind diese Verfügungen aussagekräftig in Bezug auf Krankentransporte am Lebensende?

.....%

c) Wie häufig werden diese Verfügungen nicht dem Bewohnerwunsch entsprechend berücksichtigt?

.....%

9 Inwieweit stimmen Sie den folgenden Aussagen zu?

|                                                                                                                                  | gar nicht<br>0           | 1                        | 2                        | 3                        | voll<br>4                |
|----------------------------------------------------------------------------------------------------------------------------------|--------------------------|--------------------------|--------------------------|--------------------------|--------------------------|
| Heimbewohner werden am Lebensende zu häufig im Krankenhaus behandelt.....                                                        | <input type="checkbox"/> | <input type="checkbox"/> | <input type="checkbox"/> | <input type="checkbox"/> | <input type="checkbox"/> |
| Hausärzte sind in der Regel gut für die Versorgung von Heimbewohnern am Lebensende ausgebildet.....                              | <input type="checkbox"/> | <input type="checkbox"/> | <input type="checkbox"/> | <input type="checkbox"/> | <input type="checkbox"/> |
| Hausärzte sollten für die Versorgung am Lebensende auch außerhalb der Sprechzeiten erreichbar sein.....                          | <input type="checkbox"/> | <input type="checkbox"/> | <input type="checkbox"/> | <input type="checkbox"/> | <input type="checkbox"/> |
| Pflegepersonal der Heime sollte besser für die Versorgung am Lebensende ausgebildet werden.....                                  | <input type="checkbox"/> | <input type="checkbox"/> | <input type="checkbox"/> | <input type="checkbox"/> | <input type="checkbox"/> |
| Heimbewohner müssten häufiger in die spezialisierte ambulante palliativmedizinische Versorgung (SAPV) eingeschrieben werden..... | <input type="checkbox"/> | <input type="checkbox"/> | <input type="checkbox"/> | <input type="checkbox"/> | <input type="checkbox"/> |

10 Bitte schätzen Sie die Situation in Deutschland ein:

a) Wie hoch ist der Anteil an Heimbewohnern, der im Krankenhaus und nicht im Heim verstirbt?

.....% der verstorbenen Heimbewohner

b) Wie hat sich der Anteil im Krankenhaus verstorbener Heimbewohner in den letzten 10 Jahren verändert?

ist zurückgegangen     blieb unverändert     ist angestiegen

c) Wie ist die Versorgung von Heimbewohnern am Lebensende insgesamt?

eher schlecht     eher gut

→ d) Falls Sie mit „eher schlecht“ geantwortet haben, was wäre nach Ihrer Einschätzung die wichtigste Maßnahme, mit der die Versorgung verbessert werden könnte?

.....  
.....

## Versorgung durch Ärzte und andere Berufsgruppen in Ihrer Einrichtung

11 Wie viele verschiedene Hausärzte versorgen mind. einen Bewohner in Ihrer Einrichtung?

ca. .... Hausärzte

12 Welchen Anteil der Bewohner, die im Krankenhaus stationär behandelt wurden, sieht der Hausarzt innerhalb der ersten Woche nach Entlassung?

- 0-25%     26-50%     51-75%     76-100%

13 Welche der folgenden Ärzte führen regelmäßig Hausbesuche in Ihrer Einrichtung durch (d.h. mind. ein Besuch pro Jahr bei mind. einem Bewohner)?

|                             | nein                     | ja                       |                                                           |
|-----------------------------|--------------------------|--------------------------|-----------------------------------------------------------|
| Psychiater/ Neurologen..... | <input type="checkbox"/> | <input type="checkbox"/> | → Dies sind ca. .... verschiedene Psychiater/ Neurologen. |
| Hals-Nasen-Ohrenärzte.....  | <input type="checkbox"/> | <input type="checkbox"/> | → Dies sind ca. .... verschiedene Hals-Nasen-Ohrenärzte.  |
| Augenärzte.....             | <input type="checkbox"/> | <input type="checkbox"/> | → Dies sind ca. .... verschiedene Augenärzte.             |
| Urologen.....               | <input type="checkbox"/> | <input type="checkbox"/> | → Dies sind ca. .... verschiedene Urologen.               |
| Zahnärzte.....              | <input type="checkbox"/> | <input type="checkbox"/> | → Dies sind ca. .... verschiedene Zahnärzte.              |

14 Welche der folgenden Berufsgruppen führen regelmäßig Hausbesuche in Ihrer Einrichtung durch (d.h. mind. ein Besuch pro Jahr bei mind. einem Bewohner)?

|                         | nein                     | ja                       |                                                       |
|-------------------------|--------------------------|--------------------------|-------------------------------------------------------|
| Physiotherapeuten.....  | <input type="checkbox"/> | <input type="checkbox"/> | → Dies sind ca. .... verschiedene Physiotherapeuten.  |
| Logopäden.....          | <input type="checkbox"/> | <input type="checkbox"/> | → Dies sind ca. .... verschiedene Logopäden.          |
| Augenoptiker.....       | <input type="checkbox"/> | <input type="checkbox"/> | → Dies sind ca. .... verschiedene Augenoptiker.       |
| Hörgeräteakustiker..... | <input type="checkbox"/> | <input type="checkbox"/> | → Dies sind ca. .... verschiedene Hörgeräteakustiker. |

### Angaben zu Ihrer Einrichtung

- 15 a) Trägerschaft:  Freigemeinnütziger Träger     Privater Träger     Kommunalen Träger
- b) Anzahl Pflegeplätze: ..... Betten
- c) In welchem Bundesland liegt die Einrichtung? .....
- d) Wie groß ist der Ort, in dem die Einrichtung liegt?
- bis 2.000 Einwohner     bis 5.000 Einwohner     bis 20.000 Einwohner
- bis 50.000 Einwohner     bis 100.000 Einwohner     mehr als 100.000 Einwohner
- e) Wie weit ist das nächste Krankenhaus mit Notaufnahme von Ihrer Einrichtung entfernt? ca. .... km

### Angaben zu Ihrer Person

- 16 a) Alter: ..... Jahre
- b) Geschlecht:  männlich     weiblich
- c) Ihre aktuelle Position:
- Pflegedienstleitung     Einrichtungsleitung     Geschäftsführung
- sonstige, und zwar .....
- d) Wie lange sind Sie bereits in dieser Position tätig? ..... Jahre

Vielen Dank für Ihre Teilnahme!
